# Supplementary material for: Metformin reverses bFGF-induced epithelial-mesenchymal transition in HCC cells
Source: PubMed Central journal article supplement (PMC5732803; doi:10.18632/oncotarget.22200), 2017-10-31
Supplement: oncotarget-08-104247-s001.pdf [file oncotarget-08-104247-s001.pdf]

# Metformin reverses bFGF-induced epithelial-mesenchymal transition in HCC cells

## SUPPLEMENTARY MATERIALS

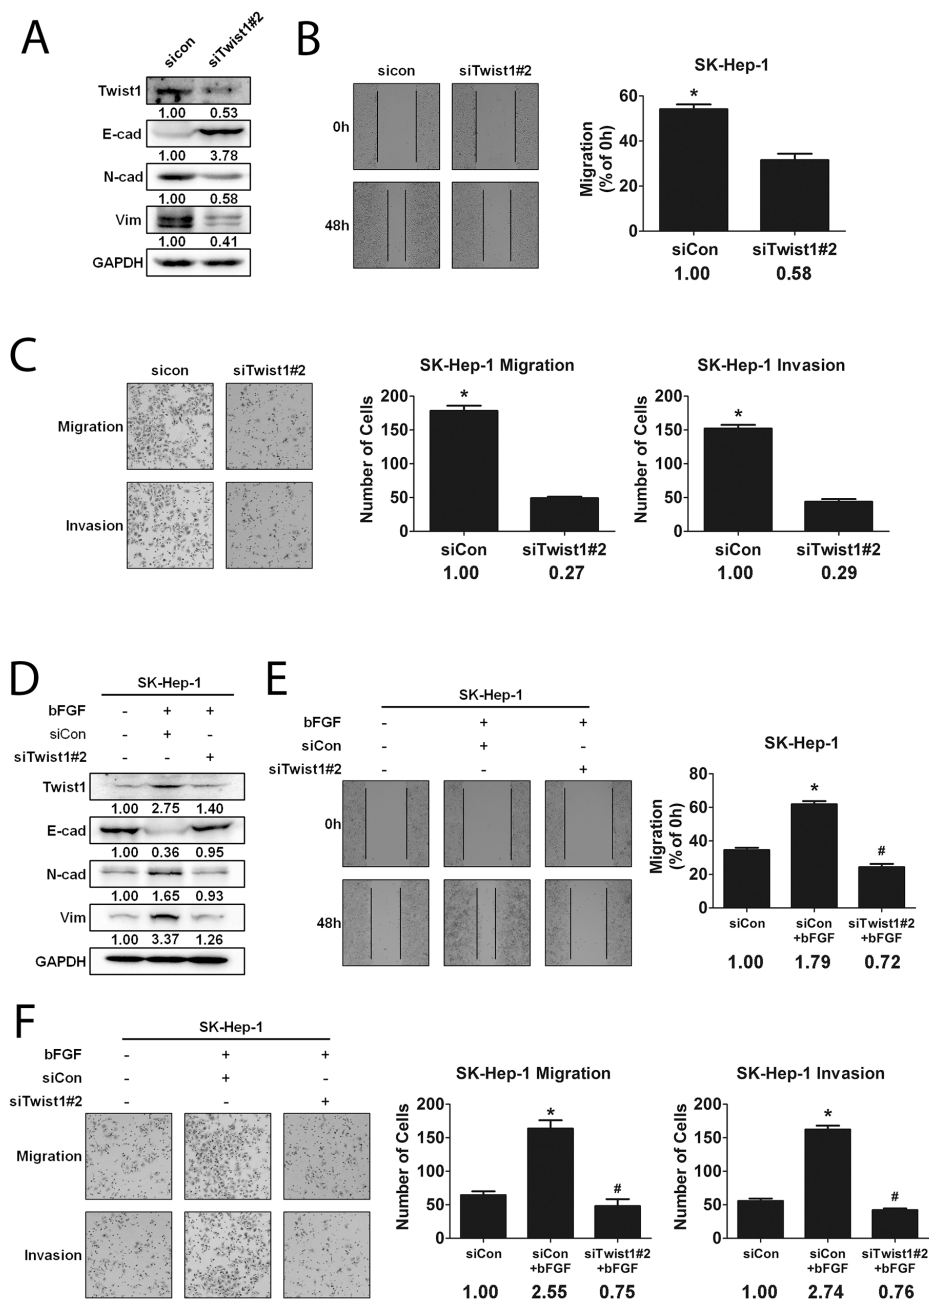

**Supplementary Figure 1: Twist1 played a crucial role in bFGF-induced EMT of HCC cells.** (A) E-cad, N-cad and Vimentin levels were detected by western blotting after silencing Twist1 in SK-Hep-1 cells. The metastatic potential of SK-Hep-1 cells after Twist1 knockdown was evaluated by wound healing (B) and migration and invasion assay (C). (D) Western blotting was used to validate cell phenotypes associated with EMT in Twist1-knockdown SK-Hep-1 cells treated with bFGF. The metastatic potential of Twist1-knockdown SK-Hep-1 cells treated with bFGF was evaluated by wound healing (E) and migration and invasion assay (F), and Twist1 was found to be important for EMT induced by bFGF. \*p<0.05 compared with control, #p<0.05 compared with bFGF.

**Supplementary Table 1: Quantitative proteomics data of HCC cells with or without metformin treatment.**

**See Supplementary File 1**
